# Supplementary material for: Trypsin-like Inhibitor Domain (TIL)-Harboring Protein Is Essential for Aedes aegypti Reproduction
Source: MDPI journal article supplement (doi:10.3390/ijms23147736), 2022-07-13
Supplement: s1 [file s1]

## SUPPLEMENTARY FIGURES

A

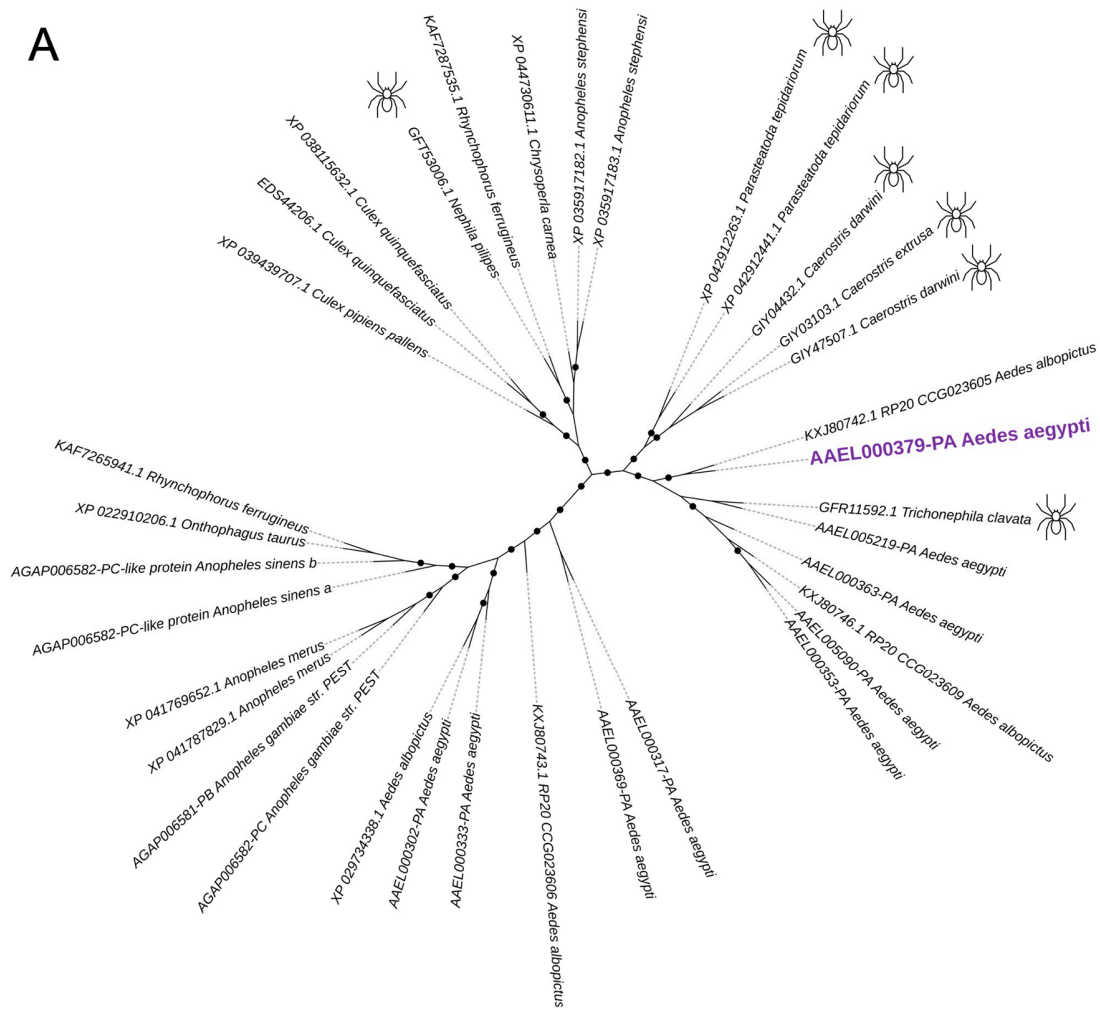

B

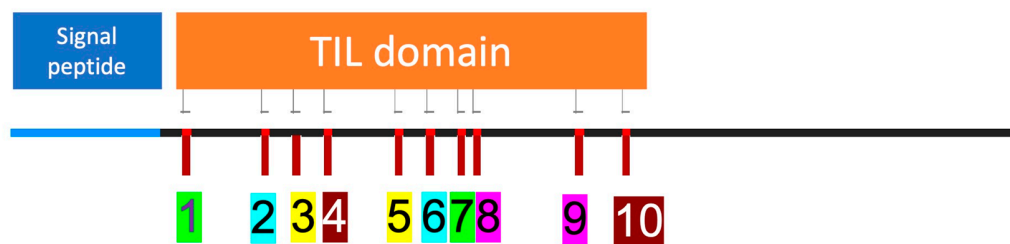

**Supplementary Figure S1:** (A) Unrooted phylogenetic tree of *Ae. aegypti* CRVP379 and closely related proteins obtained from the NCBI (nr database). CRVP379 is highlighted in bolded purple. Bootstrap values of 70% or higher are highlighted with dots. Proteins from spiders are highlighted with icons. (B) Schematic representation of key features from *Ae. aegypti* CRVP379. Cysteine residues predicted to form disulfide bridges are highlighted in the same color.

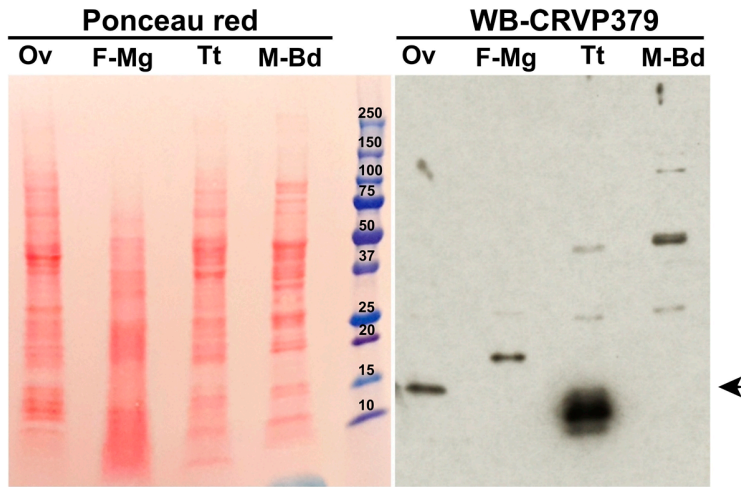

**Supplementary Figure S2:** Detection of CRVP379 with Western blotting utilizing anti-CRVP379 antibody. Ov: ovaries; F-mg: female midgut; T: male testes; M-bd: male body without testes. Left panel: Ponceau staining; right panel: Western blotting. Arrow indicates CRVP379 band.

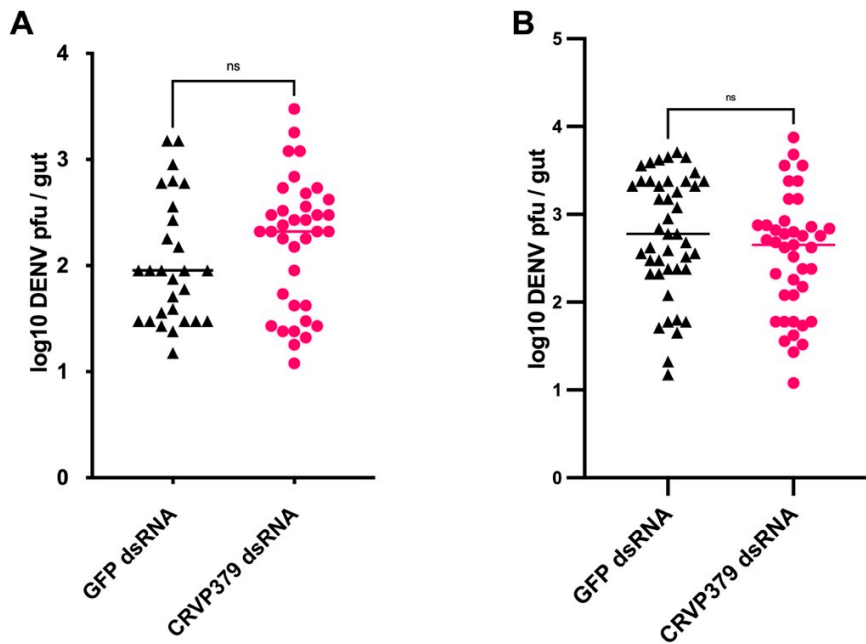

**Supplementary Figure S3:** Effect of CRVP379 gene silencing on DENV titers in the *Ae. aegypti* Rockefeller midgut. (A) 4 days after infection; (B) 7 days after infection. There was no statistically significant difference in DENV titers between control mosquitoes injected with GFP dsRNA and CRVP379 dsRNA (Mann Whitney test:  $p=0.2645$  for day 4,  $p=0.1239$  for day 7).

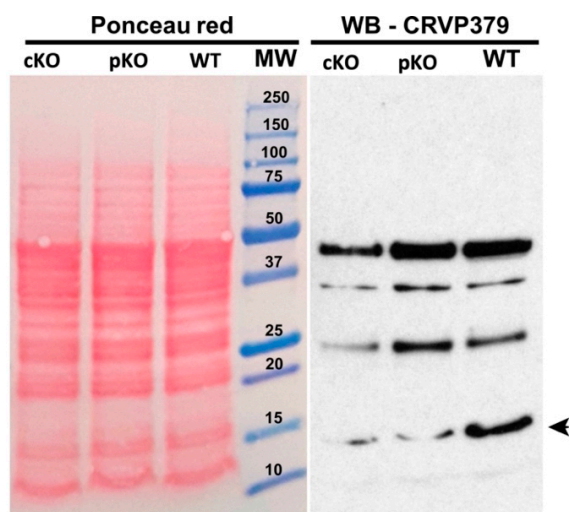

**Supplementary Figure S4:** Detection of CRVP379 with Western blotting utilizing anti-CRVP379 antibody in wild-type, CRVP-pKO, and CRVP-cKO whole bodies. Left panel: Ponceau staining, right panel: Western blotting. Arrow indicates CRVP379 band.

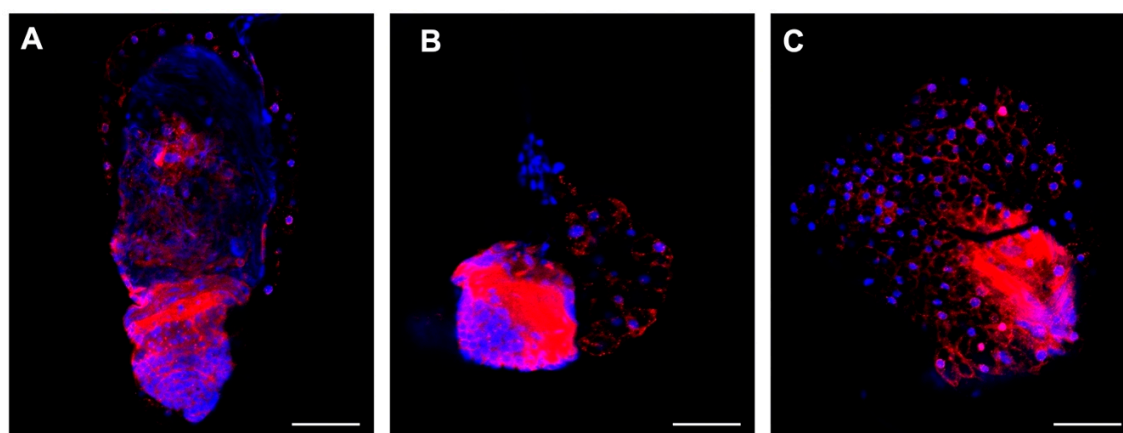

**Supplementary Figure S5:** Immunofluorescent detection of CRVP379 in the testes of *Ae. aegypti*. Anti-CRVP379 antibody: red; DAPI: blue. (A) *Ae. aegypti* Liverpool. (B) CRVP-pKO. (C) CRVP-cKO, 20X magnification, Bar scale = 100µm.

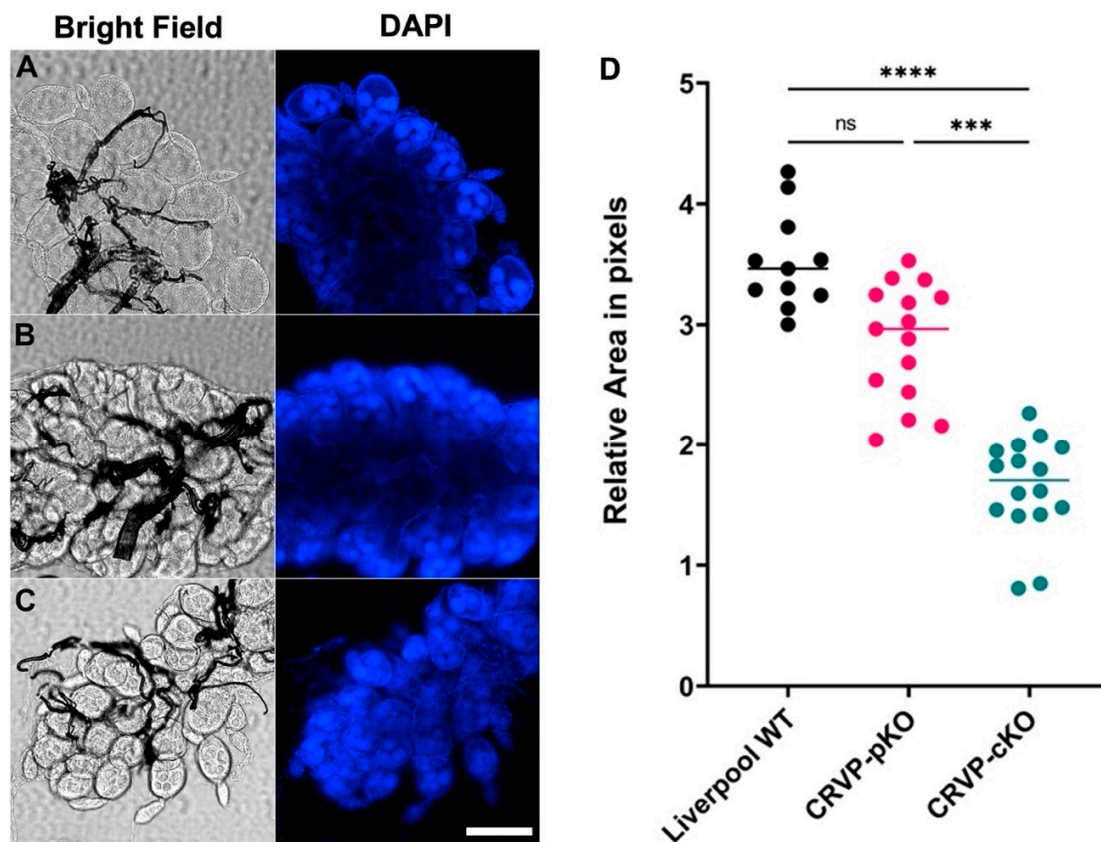

**Supplementary Figure S6:** (A) General morphology of follicles in wild-type (A) Liverpool, (B) CRVP-Pko (C) CRVP-cKO ovaries, 20X magnification (D) Follicle size as measured by the area (pixels) tool in ImageJ Fiji for wild-type Liverpool, each data set represents one follicle, CRVP-pKO, and CRVP-cKO ovaries (Dunn's multiple comparison test, \*\*\*\*  $p < 0.0001$  between Liverpool and CRVP-cKO, \*\*\*  $p = 0.0005$  between CRVP-pKO and CRVP-cKO. ns- non-significant). Bar scale = 100  $\mu\text{m}$ .

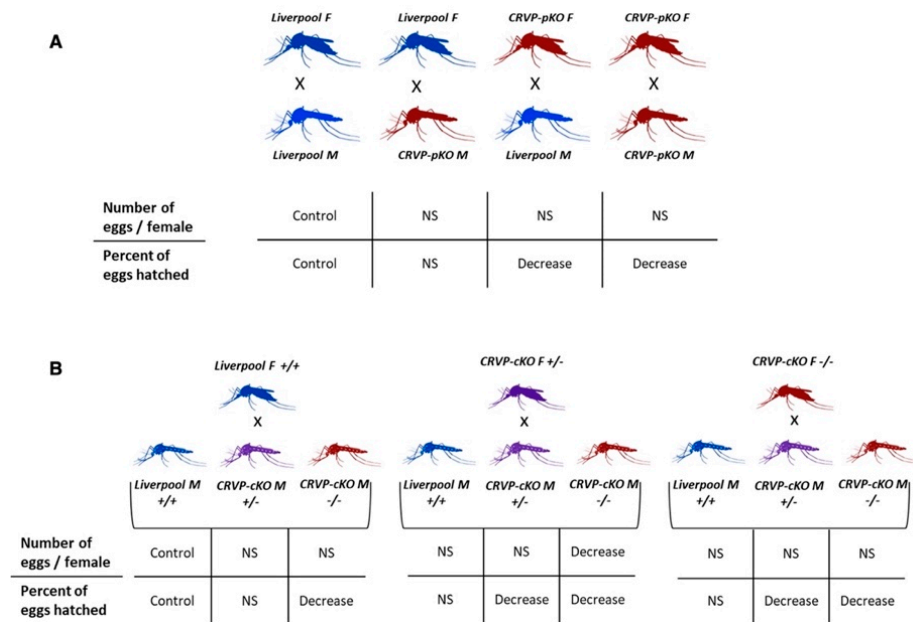

**Supplementary Figure S7:** Graphical representation of various CRVP379 crosses; F-female, M- male, NS- No significant change compared to WT Liverpool cross, Decrease- Statistically significant decrease A) CRVP-pKO crosses B) CRVP-cKO crosses; WT Liverpool +/+, CRVP379 heterozygous genotype +/-, CRVP379 homozygous genotype -/-. Image generated with Biorender, (Agreement number AA240G3DTD, IX240G37A0)

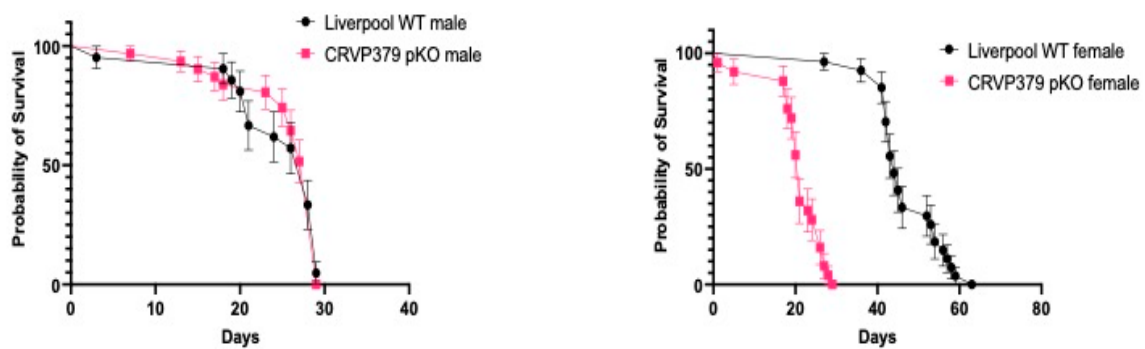

**Supplementary Figure S8:** Kaplan-Meier survival curves for wild-type Liverpool and CRVP-pKO A) Males; B) Females. There was no significant difference in the survival proportion of males ( $p=0.4545$ ). CRVP-pKo females had a significantly shorter lifespan than did Liverpool females ( $p<0.0001$ , log-rank Mantel-Cox test).

# SUPPLEMENTARY FILE S1

**Table S1** Protein sequences of CRVP379 from wild type and mutant lines

| Primer/ Guide RNA           | Sequence                                       |
|-----------------------------|------------------------------------------------|
| CRVP_seq_F /<br>CRVP_qpcr_F | 5'-CGGCACCAAACAGTTCAAG-3'                      |
| CRVP_seq_R                  | 5'-TCCTAGCCGAACAATGGCG-3'                      |
| CRVP_qpcr_R                 | 5'-CGCCGTAACGCAAGTGTAG-3'                      |
| CRVP_RNAi_F                 | 5'-TAATACGACTCACTATAGGGCGCTAATCTACACTTGCGTT-3' |
| CRVP_RNAi_F                 | 5'-TAATACGACTCACTATAGGGAGCCACCACAATGGAC-3'     |
| GFP_RNAi_R                  | 5'-TAATACGACTCACTATAGGGTTCATCTGCACCACCGGC-3'   |
| GFP_RNAi_F                  | 5'-TAATACGACTCACTATAGGGCTGGTAGTGGTCGGCGAG-3'   |
| Rps17_F                     | 5'-GCAGACCACCATTGAACACA-3'                     |
| RPS17_R                     | 5'-CACGTCCGGTCAGCTTCTTG-3'                     |
| gRNA 8                      | 5'-AACGAGGTGTACCAGGAATGTGG-3'                  |
| gRNA 4                      | 5'-CCAGTGCGTACCGAGTTCCAAGT-3'                  |
| gRNA 1                      | 5'-CCTCCGCTGGTAATACCCGTACC-3'                  |

>CRVP\_WT

MKLLISLAVIALIYTCVTASNFCSGPNEVYQECGSACEKTCAGLGANQTCNEKCVPGCFCADGFVRLNHSGQCVPSKCP  
KVRVRRAPPEPLPLVIPVPIPIVPPIVRPRGPLWWLRPPPPPLFG

>CRVP379-pKO

MKLLISLAVIALIYTCVTASNFCSGPNEVYQECGSACEKTCAGLGANQTCNEKCVPGCFCADGFVRLNHSGQCVPRPRG  
PLWWLRPPPPPLFG

>CRVP\_379-ckO

MKLLISLAVIALIYTCVTASNFCSGPNEVYQAKCGSACANVAQLARRHVPALESTSRA TKSAFRDASARMGSFGSTIAAS  
AYRVPSVPK
